# Supplementary material for: Assessing Financial Performance Disparities in the Vietnam Logistics Sector Amidst COVID-19: A Hybrid MCDM Evaluation Approach Using MEREC-COBRA
Source: Research Square preprint supplement (doi:10.21203/rs.3.rs-6484793/v1), 2025-09-09
Supplement: Supplementary file 1 [file 8a88ba184370d4b5abf75a51.docx]

**Appendix**

**Table A1.** Normalized decision matrix (2019-2024)

| **Companies** | **C1** | **C2** | **C3** | **C4** | **C5** | **C6** | **C7** | **C8** | **C9** | **C10** | **C11** | **C12** | **C13** | **C14** | **C15** | **C16** | **C17** |
| --- | --- | --- | --- | --- | --- | --- | --- | --- | --- | --- | --- | --- | --- | --- | --- | --- | --- |
| 2019 | | | | | | | | | | | | | | | | | |
| 3PL-01 | 0.745 | 0.745 | 0.518 | 0.771 | 0.852 | 0.364 | 0.006 | 0.636 | 0.038 | 0.328 | 0.086 | 1.000 | 0.856 | 0.828 | 0.718 | 0.277 | 0.832 |
| 3PL-02 | 0.448 | 0.448 | 1.000 | 0.710 | 0.909 | 0.340 | 0.012 | 0.415 | 0.117 | 0.406 | 0.139 | 0.812 | 0.804 | 0.806 | 0.866 | 0.204 | 0.864 |
| 3PL-03 | 1.000 | 1.000 | 0.625 | 0.611 | 1.000 | 0.305 | 0.751 | 0.350 | 0.056 | 0.359 | 0.132 | 0.996 | 0.847 | 0.867 | 0.552 | 0.195 | 0.838 |
| 3PL-04 | 0.257 | 0.259 | 0.604 | 0.916 | 0.718 | 0.338 | 0.234 | 0.354 | 1.000 | 1.000 | 0.995 | 0.711 | 0.864 | 0.790 | 0.750 | 0.238 | 0.823 |
| 3PL-05 | 0.183 | 0.180 | 0.542 | 0.762 | 0.861 | 0.380 | 0.009 | 0.688 | 0.043 | 0.315 | 0.073 | 0.851 | 0.765 | 0.770 | 0.615 | 0.067 | 0.776 |
| 3PL-06 | 0.310 | 0.304 | 0.620 | 0.845 | 0.783 | 0.549 | 0.010 | 0.388 | 0.150 | 0.634 | 0.147 | 0.716 | 0.780 | 0.768 | 0.565 | 0.167 | 1.000 |
| 3PL-07 | 0.369 | 0.352 | 0.910 | 0.741 | 0.880 | 0.423 | 0.012 | 0.445 | 0.035 | 0.401 | 0.094 | 0.773 | 0.773 | 0.779 | 0.663 | 0.191 | 0.845 |
| 3PL-08 | 0.726 | 0.728 | 0.868 | 0.632 | 0.981 | 0.313 | 0.066 | 0.323 | 0.239 | 0.548 | 0.267 | 0.909 | 1.000 | 1.000 | 0.638 | 0.189 | 0.886 |
| 3PL-09 | 0.570 | 0.566 | 0.688 | 0.698 | 0.920 | 0.394 | 0.014 | 0.484 | 0.049 | 0.341 | 0.075 | 0.855 | 0.779 | 0.789 | 0.652 | 0.240 | 0.810 |
| 3PL-10 | 0.237 | 0.238 | 0.629 | 0.841 | 0.787 | 0.591 | 0.012 | 0.527 | 0.239 | 0.403 | 0.077 | 0.756 | 0.779 | 0.768 | 0.678 | 0.165 | 0.697 |
| 3PL-11 | 0.280 | 0.277 | 0.727 | 0.836 | 0.792 | 0.552 | 0.010 | 0.494 | 0.103 | 0.425 | 0.087 | 0.764 | 0.800 | 0.780 | 0.650 | 0.231 | 0.825 |
| 3PL-12 | 0.465 | 0.459 | 0.685 | 0.885 | 0.747 | 0.470 | 0.005 | 1.000 | 0.027 | 0.309 | 0.067 | 0.817 | 0.770 | 0.757 | 0.655 | 0.227 | 0.785 |
| 3PL-13 | 0.348 | 0.351 | 0.966 | 0.804 | 0.821 | 0.424 | 0.010 | 0.405 | 0.541 | 0.529 | 0.157 | 0.758 | 0.834 | 0.806 | 0.671 | 0.234 | 0.785 |
| 3PL-14 | 0.252 | 0.254 | 0.711 | 0.796 | 0.829 | 0.382 | 0.008 | 0.464 | 0.813 | 0.426 | 0.136 | 0.757 | 0.780 | 0.775 | 0.634 | 0.200 | 0.800 |
| 3PL-15 | 0.260 | 0.257 | 0.600 | 0.807 | 0.819 | 0.424 | 0.011 | 0.411 | 0.126 | 0.518 | 0.153 | 0.713 | 0.742 | 0.751 | 0.619 | 1.000 | 0.780 |
| 3PL-16 | 0.190 | 0.184 | 0.524 | 1.000 | 0.641 | 1.000 | 0.008 | 0.754 | 0.035 | 0.373 | 0.071 | 0.713 | 0.750 | 0.738 | 0.576 | 0.254 | 0.655 |
| 3PL-17 | 0.242 | 0.242 | 0.562 | 0.967 | 0.671 | 0.338 | 1.000 | 0.385 | 0.290 | 0.824 | 1.000 | 0.724 | 0.974 | 0.807 | 1.000 | 0.288 | 0.916 |
| 2020 | | | | | | | | | | | | | | | | | |
| 3PL-01 | 1.000 | 1.000 | 0.540 | 0.737 | 0.865 | 0.304 | 0.010 | 0.913 | 0.024 | 0.231 | 0.028 | 0.830 | 0.693 | 0.728 | 0.192 | 0.125 | 0.692 |
| 3PL-02 | 0.391 | 0.392 | 1.000 | 0.736 | 0.866 | 0.277 | 0.010 | 0.518 | 0.072 | 0.273 | 0.054 | 0.743 | 0.693 | 0.729 | 0.352 | 0.268 | 1.000 |
| 3PL-03 | 0.946 | 0.947 | 0.555 | 0.595 | 1.000 | 0.253 | 1.000 | 0.319 | 0.039 | 0.278 | 0.066 | 1.000 | 0.787 | 0.829 | 0.419 | 0.619 | 0.772 |
| 3PL-04 | 0.216 | 0.218 | 0.665 | 0.907 | 0.705 | 0.287 | 0.371 | 0.321 | 1.000 | 0.788 | 0.500 | 0.706 | 0.826 | 0.769 | 0.481 | 0.689 | 0.783 |
| 3PL-05 | 0.165 | 0.163 | 0.596 | 0.731 | 0.871 | 0.325 | 0.016 | 0.587 | 0.030 | 0.257 | 0.033 | 0.801 | 0.708 | 0.740 | 0.447 | 0.429 | 0.687 |
| 3PL-06 | 0.251 | 0.248 | 0.642 | 0.811 | 0.796 | 0.449 | 0.019 | 0.332 | 0.130 | 0.561 | 0.075 | 0.712 | 0.750 | 0.756 | 0.504 | 0.680 | 0.687 |
| 3PL-07 | 0.295 | 0.284 | 0.809 | 0.749 | 0.853 | 0.401 | 0.018 | 0.428 | 0.027 | 0.318 | 0.037 | 0.770 | 0.737 | 0.758 | 0.487 | 0.712 | 0.811 |
| 3PL-08 | 0.447 | 0.448 | 0.789 | 0.652 | 0.946 | 0.274 | 0.070 | 0.298 | 0.150 | 0.473 | 0.136 | 0.897 | 1.000 | 1.000 | 0.434 | 0.598 | 0.607 |
| 3PL-09 | 0.713 | 0.707 | 0.639 | 0.659 | 0.939 | 0.327 | 0.023 | 0.410 | 0.027 | 0.274 | 0.034 | 0.875 | 0.744 | 0.777 | 0.435 | 0.723 | 0.711 |
| 3PL-10 | 0.287 | 0.287 | 0.862 | 0.766 | 0.838 | 0.447 | 0.020 | 0.414 | 0.192 | 0.340 | 0.037 | 0.783 | 0.770 | 0.777 | 0.456 | 1.000 | 0.650 |
| 3PL-11 | 0.272 | 0.270 | 0.770 | 0.789 | 0.816 | 0.425 | 0.018 | 0.432 | 0.071 | 0.338 | 0.040 | 0.762 | 0.752 | 0.761 | 0.431 | 0.635 | 0.713 |
| 3PL-12 | 0.512 | 0.514 | 0.696 | 0.846 | 0.762 | 0.389 | 0.009 | 1.000 | 0.069 | 0.242 | 0.028 | 0.856 | 0.732 | 0.742 | 0.378 | 0.675 | 0.732 |
| 3PL-13 | 0.269 | 0.270 | 0.851 | 0.799 | 0.806 | 0.345 | 0.018 | 0.362 | 0.189 | 0.442 | 0.086 | 0.755 | 0.809 | 0.793 | 0.497 | 0.728 | 0.737 |
| 3PL-14 | 0.213 | 0.215 | 0.694 | 0.771 | 0.833 | 0.320 | 0.015 | 0.382 | 0.779 | 0.380 | 0.075 | 0.750 | 0.755 | 0.766 | 0.662 | 0.922 | 0.838 |
| 3PL-15 | 0.233 | 0.230 | 0.565 | 0.773 | 0.831 | 0.359 | 0.023 | 0.352 | 0.087 | 0.443 | 0.074 | 0.692 | 0.677 | 0.716 | 0.477 | 0.279 | 0.678 |
| 3PL-16 | 0.178 | 0.171 | 0.507 | 1.000 | 0.616 | 1.000 | 0.012 | 0.731 | 0.023 | 0.296 | 0.031 | 0.585 | 0.420 | 0.661 | 0.376 | 0.910 | 0.634 |
| 3PL-17 | 0.208 | 0.192 | 0.522 | 0.949 | 0.665 | 0.277 | 0.236 | 0.310 | 0.035 | 1.000 | 1.000 | 0.700 | 0.874 | 0.770 | 1.000 | 0.623 | 0.915 |
| 2021 | | | | | | | | | | | | | | | | | |
| 3PL-01 | 1.000 | 1.000 | 0.780 | 0.883 | 0.941 | 0.743 | 0.012 | 1.000 | 0.011 | 0.444 | 0.048 | 0.868 | 0.866 | 0.885 | 0.675 | 0.432 | 0.837 |
| 3PL-02 | 0.343 | 0.342 | 0.824 | 0.893 | 0.931 | 0.723 | 0.012 | 0.610 | 0.021 | 0.480 | 0.074 | 0.836 | 0.867 | 0.886 | 0.789 | 0.482 | 0.867 |
| 3PL-03 | 0.932 | 0.931 | 0.807 | 0.821 | 1.000 | 0.696 | 0.520 | 0.483 | 0.016 | 0.490 | 0.096 | 0.947 | 0.917 | 0.936 | 0.821 | 0.550 | 0.868 |
| 3PL-04 | 0.329 | 0.331 | 0.840 | 0.977 | 0.851 | 0.720 | 0.201 | 0.484 | 1.000 | 0.870 | 0.618 | 0.830 | 0.930 | 0.905 | 0.855 | 0.551 | 0.913 |
| 3PL-05 | 0.284 | 0.283 | 0.812 | 0.890 | 0.934 | 0.768 | 0.016 | 0.624 | 0.016 | 0.475 | 0.057 | 0.884 | 0.889 | 0.901 | 0.835 | 0.647 | 0.873 |
| 3PL-06 | 0.352 | 0.349 | 0.847 | 0.930 | 0.895 | 0.925 | 0.017 | 0.510 | 0.036 | 0.613 | 0.074 | 0.832 | 0.884 | 0.894 | 0.790 | 0.517 | 0.983 |
| 3PL-07 | 0.385 | 0.381 | 0.935 | 0.908 | 0.916 | 0.849 | 0.016 | 0.554 | 0.014 | 0.519 | 0.061 | 0.900 | 0.943 | 0.931 | 0.941 | 1.000 | 1.000 |
| 3PL-08 | 0.562 | 0.563 | 0.911 | 0.845 | 0.977 | 0.715 | 0.042 | 0.471 | 0.066 | 0.625 | 0.156 | 0.905 | 1.000 | 1.000 | 0.804 | 0.536 | 0.876 |
| 3PL-09 | 0.779 | 0.771 | 0.897 | 0.847 | 0.975 | 0.764 | 0.020 | 0.524 | 0.010 | 0.486 | 0.058 | 0.906 | 0.899 | 0.915 | 0.808 | 0.560 | 0.861 |
| 3PL-10 | 0.421 | 0.419 | 1.000 | 0.887 | 0.937 | 0.858 | 0.020 | 0.544 | 0.025 | 0.510 | 0.056 | 0.865 | 0.895 | 0.906 | 0.717 | 0.489 | 0.837 |
| 3PL-11 | 0.378 | 0.375 | 0.872 | 0.917 | 0.908 | 0.892 | 0.016 | 0.563 | 0.023 | 0.518 | 0.058 | 0.853 | 0.894 | 0.901 | 0.779 | 0.522 | 0.883 |
| 3PL-12 | 0.433 | 0.434 | 0.824 | 0.939 | 0.886 | 0.819 | 0.012 | 0.767 | 0.032 | 0.468 | 0.054 | 1.000 | 0.959 | 0.929 | 0.896 | 0.926 | 0.878 |
| 3PL-13 | 0.369 | 0.370 | 0.893 | 0.917 | 0.908 | 0.807 | 0.019 | 0.502 | 0.064 | 0.620 | 0.097 | 0.849 | 0.925 | 0.918 | 0.787 | 0.521 | 0.829 |
| 3PL-14 | 0.340 | 0.341 | 0.904 | 0.903 | 0.922 | 0.739 | 0.015 | 0.504 | 0.289 | 0.592 | 0.126 | 0.849 | 0.911 | 0.913 | 1.000 | 0.691 | 0.977 |
| 3PL-15 | 0.344 | 0.342 | 0.778 | 0.913 | 0.912 | 0.790 | 0.021 | 0.503 | 0.030 | 0.612 | 0.100 | 0.833 | 0.883 | 0.895 | 0.825 | 0.957 | 0.881 |
| 3PL-16 | 0.341 | 0.334 | 0.777 | 0.967 | 0.860 | 1.000 | 0.014 | 0.635 | 0.007 | 0.506 | 0.056 | 0.917 | 0.999 | 0.934 | 0.806 | 0.111 | 0.842 |
| 3PL-17 | 0.319 | 0.314 | 0.762 | 1.000 | 0.828 | 0.723 | 1.000 | 0.480 | 0.028 | 1.000 | 1.000 | 0.826 | 0.924 | 0.897 | 0.839 | 0.480 | 0.914 |
| 2022 | | | | | | | | | | | | | | | | | |
| 3PL-01 | 0.729 | 0.727 | 0.634 | 0.724 | 0.899 | 0.543 | 0.018 | 0.635 | 0.064 | 0.258 | 0.027 | 1.000 | 0.750 | 0.759 | 1.000 | 1.000 | 0.700 |
| 3PL-02 | 0.336 | 0.334 | 0.584 | 0.795 | 0.833 | 0.554 | 0.016 | 0.468 | 0.181 | 0.346 | 0.058 | 0.711 | 0.700 | 0.713 | 0.944 | 0.385 | 0.907 |
| 3PL-03 | 1.000 | 1.000 | 0.574 | 0.613 | 1.000 | 0.464 | 1.000 | 0.348 | 0.118 | 0.291 | 0.074 | 0.980 | 0.778 | 0.807 | 0.331 | 0.113 | 0.640 |
| 3PL-04 | 0.220 | 0.220 | 0.494 | 0.896 | 0.741 | 0.513 | 0.530 | 0.345 | 1.000 | 0.854 | 0.461 | 0.682 | 0.794 | 0.745 | 0.308 | 0.120 | 0.568 |
| 3PL-05 | 0.157 | 0.156 | 0.618 | 0.791 | 0.837 | 0.604 | 0.023 | 0.671 | 0.102 | 0.272 | 0.027 | 0.858 | 0.740 | 0.739 | 0.418 | 0.170 | 0.777 |
| 3PL-06 | 0.219 | 0.214 | 0.553 | 0.858 | 0.776 | 1.000 | 0.028 | 0.411 | 0.237 | 0.468 | 0.035 | 0.690 | 0.717 | 0.716 | 0.389 | 0.151 | 0.736 |
| 3PL-07 | 0.252 | 0.246 | 0.632 | 0.813 | 0.817 | 0.835 | 0.027 | 0.487 | 0.089 | 0.342 | 0.027 | 0.875 | 0.879 | 0.819 | 0.564 | 0.226 | 1.000 |
| 3PL-08 | 0.550 | 0.550 | 0.735 | 0.646 | 0.968 | 0.541 | 0.117 | 0.318 | 0.474 | 0.517 | 0.091 | 0.873 | 1.000 | 1.000 | 0.341 | 0.118 | 0.579 |
| 3PL-09 | 0.607 | 0.599 | 0.870 | 0.675 | 0.943 | 0.585 | 0.039 | 0.444 | 0.064 | 0.284 | 0.027 | 0.864 | 0.733 | 0.753 | 0.354 | 0.113 | 0.694 |
| 3PL-10 | 0.301 | 0.302 | 1.000 | 0.772 | 0.855 | 0.716 | 0.037 | 0.470 | 0.746 | 0.331 | 0.029 | 0.757 | 0.730 | 0.736 | 0.412 | 0.035 | 0.714 |
| 3PL-11 | 0.264 | 0.261 | 0.689 | 0.818 | 0.812 | 0.816 | 0.028 | 0.492 | 0.158 | 0.342 | 0.027 | 0.745 | 0.739 | 0.734 | 0.417 | 0.131 | 0.730 |
| 3PL-12 | 0.346 | 0.345 | 0.589 | 0.855 | 0.779 | 0.689 | 0.015 | 1.000 | 0.141 | 0.253 | 0.021 | 0.782 | 0.695 | 0.705 | 0.279 | 0.027 | 0.635 |
| 3PL-13 | 0.273 | 0.272 | 0.743 | 0.794 | 0.834 | 0.633 | 0.037 | 0.363 | 0.452 | 0.543 | 0.080 | 0.723 | 0.807 | 0.781 | 0.400 | 0.128 | 0.612 |
| 3PL-14 | 0.262 | 0.262 | 0.715 | 0.714 | 0.907 | 0.543 | 0.025 | 0.405 | 0.776 | 0.347 | 0.052 | 0.784 | 0.752 | 0.762 | 0.197 | 0.125 | 0.622 |
| 3PL-15 | 0.297 | 0.292 | 0.579 | 0.746 | 0.879 | 0.571 | 0.060 | 0.352 | 0.223 | 0.520 | 0.091 | 0.737 | 0.806 | 0.795 | 0.448 | 0.391 | 0.704 |
| 3PL-16 | 0.250 | 0.232 | 0.458 | 0.813 | 0.817 | 0.769 | 0.029 | 0.429 | 0.048 | 0.399 | 0.037 | 0.794 | 0.852 | 0.803 | 0.585 | 0.168 | 0.624 |
| 3PL-17 | 0.189 | 0.184 | 0.480 | 1.000 | 0.646 | 0.511 | 0.199 | 0.349 | 0.233 | 1.000 | 1.000 | 0.669 | 0.765 | 0.709 | 0.347 | 0.097 | 0.675 |
| 2023 | | | | | | | | | | | | | | | | | |
| 3PL-01 | 1.000 | 1.000 | 0.733 | 0.713 | 0.950 | 0.590 | 0.010 | 0.502 | 0.087 | 0.321 | 0.047 | 0.858 | 0.778 | 0.809 | 1.000 | 0.386 | 0.831 |
| 3PL-02 | 0.489 | 0.487 | 0.643 | 0.794 | 0.873 | 0.585 | 0.008 | 0.442 | 0.245 | 0.403 | 0.096 | 0.611 | 0.676 | 0.725 | 0.669 | 0.089 | 0.746 |
| 3PL-03 | 0.789 | 0.791 | 0.545 | 0.661 | 1.000 | 0.549 | 1.000 | 0.401 | 0.175 | 0.330 | 0.062 | 0.966 | 0.826 | 0.864 | 0.648 | 0.293 | 0.810 |
| 3PL-04 | 0.329 | 0.330 | 0.595 | 0.885 | 0.786 | 0.550 | 0.225 | 0.328 | 1.000 | 0.905 | 0.652 | 0.625 | 0.810 | 0.788 | 0.555 | 0.287 | 0.689 |
| 3PL-05 | 0.376 | 0.375 | 0.911 | 0.731 | 0.933 | 0.668 | 0.013 | 0.541 | 0.149 | 0.317 | 0.036 | 1.000 | 0.840 | 0.853 | 0.681 | 0.785 | 0.771 |
| 3PL-06 | 0.329 | 0.318 | 0.718 | 0.855 | 0.814 | 1.000 | 0.016 | 0.389 | 0.168 | 0.534 | 0.057 | 0.632 | 0.741 | 0.759 | 0.660 | 0.288 | 0.755 |
| 3PL-07 | 0.368 | 0.358 | 0.650 | 0.803 | 0.865 | 0.927 | 0.015 | 0.500 | 0.103 | 0.368 | 0.034 | 0.685 | 0.741 | 0.767 | 0.563 | 0.111 | 0.787 |
| 3PL-08 | 0.616 | 0.618 | 0.735 | 0.694 | 0.967 | 0.572 | 0.041 | 0.319 | 0.579 | 0.560 | 0.154 | 0.789 | 1.000 | 1.000 | 0.659 | 0.297 | 0.821 |
| 3PL-09 | 0.648 | 0.637 | 0.639 | 0.678 | 0.983 | 0.629 | 0.020 | 0.441 | 0.069 | 0.323 | 0.039 | 0.811 | 0.753 | 0.795 | 0.633 | 0.305 | 0.794 |
| 3PL-10 | 0.505 | 0.506 | 0.639 | 0.776 | 0.890 | 0.859 | 0.016 | 0.433 | 0.485 | 0.399 | 0.040 | 0.671 | 0.738 | 0.769 | 0.770 | 1.000 | 0.785 |
| 3PL-11 | 0.389 | 0.383 | 0.663 | 0.846 | 0.824 | 0.990 | 0.012 | 0.513 | 0.162 | 0.382 | 0.036 | 0.680 | 0.756 | 0.769 | 0.729 | 0.372 | 0.910 |
| 3PL-12 | 0.517 | 0.517 | 1.000 | 0.838 | 0.831 | 0.722 | 0.007 | 1.000 | 0.215 | 0.291 | 0.030 | 0.794 | 0.736 | 0.759 | 0.585 | 0.500 | 0.738 |
| 3PL-13 | 0.383 | 0.382 | 0.859 | 0.802 | 0.865 | 0.680 | 0.031 | 0.345 | 0.424 | 0.620 | 0.123 | 0.666 | 0.843 | 0.832 | 0.690 | 0.340 | 0.782 |
| 3PL-14 | 0.397 | 0.398 | 0.757 | 0.778 | 0.888 | 0.749 | 0.011 | 0.584 | 0.728 | 0.326 | 0.034 | 0.646 | 0.690 | 0.735 | 0.452 | 0.088 | 1.000 |
| 3PL-15 | 0.451 | 0.448 | 0.581 | 0.756 | 0.909 | 0.602 | 0.040 | 0.347 | 0.300 | 0.540 | 0.134 | 0.624 | 0.707 | 0.748 | 0.542 | 0.092 | 0.729 |
| 3PL-16 | 0.547 | 0.520 | 0.770 | 0.789 | 0.878 | 0.732 | 0.012 | 0.361 | 0.121 | 0.537 | 0.082 | 0.632 | 0.728 | 0.760 | 0.909 | 0.049 | 0.752 |
| 3PL-17 | 0.292 | 0.283 | 0.611 | 1.000 | 0.677 | 0.578 | 0.033 | 0.339 | 0.228 | 1.000 | 1.000 | 0.615 | 0.826 | 0.761 | 0.625 | 0.492 | 0.832 |
| 2024 | | | | | | | | | | | | | | | | | |
| 3PL-01 | 0.650 | 0.652 | 0.631 | 0.700 | 0.930 | 0.535 | 0.010 | 0.491 | 0.080 | 0.303 | 0.058 | 1.000 | 0.807 | 0.845 | 0.645 | 0.623 | 0.843 |
| 3PL-02 | 0.291 | 0.291 | 0.445 | 0.788 | 0.849 | 0.546 | 0.013 | 0.457 | 0.152 | 0.371 | 0.105 | 0.679 | 0.694 | 0.747 | 0.570 | 0.643 | 0.788 |
| 3PL-03 | 1.000 | 1.000 | 0.410 | 0.624 | 1.000 | 0.511 | 1.000 | 0.337 | 0.076 | 0.333 | 0.084 | 0.981 | 0.829 | 0.886 | 0.723 | 0.548 | 0.736 |
| 3PL-04 | 0.251 | 0.252 | 0.432 | 0.902 | 0.745 | 0.500 | 0.178 | 0.342 | 1.000 | 0.812 | 1.000 | 0.684 | 0.818 | 0.800 | 0.588 | 0.496 | 0.815 |
| 3PL-05 | 0.434 | 0.433 | 1.000 | 0.706 | 0.925 | 0.577 | 0.013 | 0.520 | 0.086 | 0.297 | 0.044 | 0.921 | 0.770 | 0.813 | 0.718 | 0.349 | 0.976 |
| 3PL-06 | 0.251 | 0.243 | 0.448 | 0.855 | 0.788 | 1.000 | 0.017 | 0.381 | 0.133 | 0.545 | 0.063 | 0.691 | 0.756 | 0.779 | 0.728 | 0.601 | 0.817 |
| 3PL-07 | 0.255 | 0.249 | 0.612 | 0.832 | 0.809 | 0.982 | 0.015 | 0.508 | 0.083 | 0.363 | 0.037 | 0.793 | 0.813 | 0.816 | 0.873 | 1.000 | 1.000 |
| 3PL-08 | 0.423 | 0.425 | 0.622 | 0.713 | 0.919 | 0.519 | 0.034 | 0.333 | 0.442 | 0.525 | 0.224 | 0.852 | 1.000 | 1.000 | 0.750 | 0.553 | 0.981 |
| 3PL-09 | 0.301 | 0.296 | 0.452 | 0.715 | 0.916 | 0.574 | 0.021 | 0.505 | 0.038 | 0.306 | 0.049 | 0.909 | 0.780 | 0.820 | 0.688 | 0.525 | 0.882 |
| 3PL-10 | 0.340 | 0.340 | 0.514 | 0.811 | 0.829 | 0.885 | 0.016 | 0.484 | 0.239 | 0.366 | 0.040 | 0.737 | 0.752 | 0.783 | 0.617 | 0.522 | 0.863 |
| 3PL-11 | 0.290 | 0.284 | 0.455 | 0.844 | 0.798 | 0.964 | 0.014 | 0.501 | 0.075 | 0.373 | 0.040 | 0.744 | 0.772 | 0.790 | 0.702 | 0.572 | 0.835 |
| 3PL-12 | 0.326 | 0.326 | 0.575 | 0.858 | 0.786 | 0.711 | 0.008 | 1.000 | 0.129 | 0.279 | 0.033 | 0.755 | 0.714 | 0.755 | 0.671 | 0.305 | 0.789 |
| 3PL-13 | 0.279 | 0.278 | 0.452 | 0.818 | 0.822 | 0.633 | 0.052 | 0.351 | 0.264 | 0.614 | 0.157 | 0.725 | 0.864 | 0.851 | 0.652 | 0.505 | 0.779 |
| 3PL-14 | 0.274 | 0.275 | 0.478 | 0.792 | 0.846 | 0.745 | 0.012 | 0.551 | 0.482 | 0.326 | 0.039 | 0.697 | 0.700 | 0.751 | 0.794 | 0.599 | 0.830 |
| 3PL-15 | 0.351 | 0.350 | 0.406 | 0.756 | 0.879 | 0.572 | 0.046 | 0.359 | 0.237 | 0.492 | 0.136 | 0.675 | 0.700 | 0.753 | 0.523 | 0.274 | 0.724 |
| 3PL-16 | 0.637 | 0.615 | 0.765 | 0.750 | 0.884 | 0.554 | 0.009 | 0.322 | 0.137 | 0.686 | 0.252 | 0.701 | 0.790 | 0.820 | 1.000 | 0.141 | 0.783 |
| 3PL-17 | 0.208 | 0.204 | 0.374 | 1.000 | 0.656 | 0.652 | 0.050 | 0.341 | 0.184 | 1.000 | 0.587 | 0.673 | 0.839 | 0.779 | 0.606 | 0.457 | 0.725 |

**Table A2.** Weight-Normalized decisio matrix (2019-2024)

| **Companies** | **C1** | **C2** | **C3** | **C4** | **C5** | **C6** | **C7** | **C8** | **C9** | **C10** | **C11** | **C12** | **C13** | **C14** | **C15** | **C16** | **C17** |
| --- | --- | --- | --- | --- | --- | --- | --- | --- | --- | --- | --- | --- | --- | --- | --- | --- | --- |
| 2019 | | | | | | | | | | | | | | | | | |
| 3PL-01 | 0.023 | 0.024 | 0.019 | 0.023 | 0.026 | 0.025 | 0.000 | 0.025 | 0.001 | 0.010 | 0.003 | 0.034 | 0.061 | 0.294 | 0.050 | 0.011 | 0.035 |
| 3PL-02 | 0.014 | 0.014 | 0.036 | 0.021 | 0.027 | 0.023 | 0.000 | 0.016 | 0.004 | 0.013 | 0.004 | 0.028 | 0.057 | 0.286 | 0.060 | 0.008 | 0.036 |
| 3PL-03 | 0.031 | 0.032 | 0.022 | 0.018 | 0.030 | 0.021 | 0.021 | 0.014 | 0.002 | 0.011 | 0.004 | 0.034 | 0.060 | 0.307 | 0.038 | 0.008 | 0.035 |
| 3PL-04 | 0.008 | 0.008 | 0.022 | 0.028 | 0.022 | 0.023 | 0.007 | 0.014 | 0.035 | 0.031 | 0.029 | 0.024 | 0.061 | 0.280 | 0.052 | 0.009 | 0.035 |
| 3PL-05 | 0.006 | 0.006 | 0.019 | 0.023 | 0.026 | 0.026 | 0.000 | 0.027 | 0.002 | 0.010 | 0.002 | 0.029 | 0.054 | 0.273 | 0.043 | 0.003 | 0.033 |
| 3PL-06 | 0.009 | 0.010 | 0.022 | 0.026 | 0.024 | 0.038 | 0.000 | 0.015 | 0.005 | 0.020 | 0.004 | 0.024 | 0.055 | 0.272 | 0.039 | 0.006 | 0.042 |
| 3PL-07 | 0.011 | 0.011 | 0.033 | 0.022 | 0.027 | 0.029 | 0.000 | 0.017 | 0.001 | 0.012 | 0.003 | 0.026 | 0.055 | 0.276 | 0.046 | 0.007 | 0.036 |
| 3PL-08 | 0.022 | 0.024 | 0.031 | 0.019 | 0.030 | 0.021 | 0.002 | 0.013 | 0.008 | 0.017 | 0.008 | 0.031 | 0.071 | 0.355 | 0.044 | 0.007 | 0.037 |
| 3PL-09 | 0.017 | 0.018 | 0.025 | 0.021 | 0.028 | 0.027 | 0.000 | 0.019 | 0.002 | 0.011 | 0.002 | 0.029 | 0.055 | 0.280 | 0.045 | 0.009 | 0.034 |
| 3PL-10 | 0.007 | 0.008 | 0.023 | 0.025 | 0.024 | 0.040 | 0.000 | 0.021 | 0.008 | 0.013 | 0.002 | 0.026 | 0.055 | 0.272 | 0.047 | 0.006 | 0.029 |
| 3PL-11 | 0.009 | 0.009 | 0.026 | 0.025 | 0.024 | 0.038 | 0.000 | 0.019 | 0.004 | 0.013 | 0.003 | 0.026 | 0.057 | 0.277 | 0.045 | 0.009 | 0.035 |
| 3PL-12 | 0.014 | 0.015 | 0.025 | 0.027 | 0.023 | 0.032 | 0.000 | 0.039 | 0.001 | 0.010 | 0.002 | 0.028 | 0.055 | 0.269 | 0.045 | 0.009 | 0.033 |
| 3PL-13 | 0.011 | 0.011 | 0.035 | 0.024 | 0.025 | 0.029 | 0.000 | 0.016 | 0.019 | 0.016 | 0.005 | 0.026 | 0.059 | 0.286 | 0.046 | 0.009 | 0.033 |
| 3PL-14 | 0.008 | 0.008 | 0.026 | 0.024 | 0.025 | 0.026 | 0.000 | 0.018 | 0.029 | 0.013 | 0.004 | 0.026 | 0.055 | 0.275 | 0.044 | 0.008 | 0.034 |
| 3PL-15 | 0.008 | 0.008 | 0.022 | 0.024 | 0.025 | 0.029 | 0.000 | 0.016 | 0.004 | 0.016 | 0.004 | 0.024 | 0.053 | 0.266 | 0.043 | 0.039 | 0.033 |
| 3PL-16 | 0.006 | 0.006 | 0.019 | 0.030 | 0.019 | 0.068 | 0.000 | 0.029 | 0.001 | 0.012 | 0.002 | 0.024 | 0.053 | 0.262 | 0.040 | 0.010 | 0.028 |
| 3PL-17 | 0.007 | 0.008 | 0.020 | 0.029 | 0.020 | 0.023 | 0.028 | 0.015 | 0.010 | 0.026 | 0.029 | 0.025 | 0.069 | 0.286 | 0.069 | 0.011 | 0.039 |
| 2020 | | | | | | | | | | | | | | | | | |
| 3PL-01 | 0.031 | 0.032 | 0.019 | 0.022 | 0.026 | 0.021 | 0.000 | 0.036 | 0.001 | 0.007 | 0.001 | 0.028 | 0.049 | 0.258 | 0.013 | 0.005 | 0.029 |
| 3PL-02 | 0.012 | 0.013 | 0.036 | 0.022 | 0.026 | 0.019 | 0.000 | 0.020 | 0.003 | 0.009 | 0.002 | 0.025 | 0.049 | 0.258 | 0.024 | 0.010 | 0.042 |
| 3PL-03 | 0.029 | 0.031 | 0.020 | 0.018 | 0.030 | 0.017 | 0.028 | 0.012 | 0.001 | 0.009 | 0.002 | 0.034 | 0.056 | 0.294 | 0.029 | 0.024 | 0.033 |
| 3PL-04 | 0.007 | 0.007 | 0.024 | 0.027 | 0.021 | 0.020 | 0.010 | 0.013 | 0.035 | 0.025 | 0.015 | 0.024 | 0.059 | 0.273 | 0.033 | 0.027 | 0.033 |
| 3PL-05 | 0.005 | 0.005 | 0.021 | 0.022 | 0.026 | 0.022 | 0.000 | 0.023 | 0.001 | 0.008 | 0.001 | 0.027 | 0.050 | 0.262 | 0.031 | 0.017 | 0.029 |
| 3PL-06 | 0.008 | 0.008 | 0.023 | 0.024 | 0.024 | 0.031 | 0.001 | 0.013 | 0.005 | 0.017 | 0.002 | 0.024 | 0.053 | 0.268 | 0.035 | 0.026 | 0.029 |
| 3PL-07 | 0.009 | 0.009 | 0.029 | 0.023 | 0.026 | 0.027 | 0.001 | 0.017 | 0.001 | 0.010 | 0.001 | 0.026 | 0.052 | 0.269 | 0.034 | 0.028 | 0.034 |
| 3PL-08 | 0.014 | 0.014 | 0.028 | 0.020 | 0.029 | 0.019 | 0.002 | 0.012 | 0.005 | 0.015 | 0.004 | 0.030 | 0.071 | 0.355 | 0.030 | 0.023 | 0.026 |
| 3PL-09 | 0.022 | 0.023 | 0.023 | 0.020 | 0.028 | 0.022 | 0.001 | 0.016 | 0.001 | 0.009 | 0.001 | 0.030 | 0.053 | 0.276 | 0.030 | 0.028 | 0.030 |
| 3PL-10 | 0.009 | 0.009 | 0.031 | 0.023 | 0.025 | 0.031 | 0.001 | 0.016 | 0.007 | 0.011 | 0.001 | 0.027 | 0.055 | 0.276 | 0.032 | 0.039 | 0.027 |
| 3PL-11 | 0.008 | 0.009 | 0.028 | 0.024 | 0.025 | 0.029 | 0.000 | 0.017 | 0.003 | 0.011 | 0.001 | 0.026 | 0.053 | 0.270 | 0.030 | 0.025 | 0.030 |
| 3PL-12 | 0.016 | 0.017 | 0.025 | 0.026 | 0.023 | 0.027 | 0.000 | 0.039 | 0.002 | 0.008 | 0.001 | 0.029 | 0.052 | 0.263 | 0.026 | 0.026 | 0.031 |
| 3PL-13 | 0.008 | 0.009 | 0.031 | 0.024 | 0.024 | 0.024 | 0.000 | 0.014 | 0.007 | 0.014 | 0.003 | 0.026 | 0.057 | 0.281 | 0.034 | 0.028 | 0.031 |
| 3PL-14 | 0.007 | 0.007 | 0.025 | 0.023 | 0.025 | 0.022 | 0.000 | 0.015 | 0.027 | 0.012 | 0.002 | 0.025 | 0.054 | 0.272 | 0.046 | 0.036 | 0.035 |
| 3PL-15 | 0.007 | 0.007 | 0.020 | 0.023 | 0.025 | 0.025 | 0.001 | 0.014 | 0.003 | 0.014 | 0.002 | 0.023 | 0.048 | 0.254 | 0.033 | 0.011 | 0.029 |
| 3PL-16 | 0.005 | 0.006 | 0.018 | 0.030 | 0.019 | 0.068 | 0.000 | 0.029 | 0.001 | 0.009 | 0.001 | 0.020 | 0.030 | 0.234 | 0.026 | 0.035 | 0.027 |
| 3PL-17 | 0.006 | 0.006 | 0.019 | 0.029 | 0.020 | 0.019 | 0.007 | 0.012 | 0.001 | 0.031 | 0.029 | 0.024 | 0.062 | 0.273 | 0.069 | 0.024 | 0.039 |
| 2021 | | | | | | | | | | | | | | | | | |
| 3PL-01 | 0.031 | 0.032 | 0.028 | 0.027 | 0.028 | 0.051 | 0.000 | 0.039 | 0.000 | 0.014 | 0.001 | 0.029 | 0.061 | 0.314 | 0.047 | 0.017 | 0.035 |
| 3PL-02 | 0.010 | 0.011 | 0.030 | 0.027 | 0.028 | 0.049 | 0.000 | 0.024 | 0.001 | 0.015 | 0.002 | 0.028 | 0.062 | 0.314 | 0.055 | 0.019 | 0.037 |
| 3PL-03 | 0.029 | 0.030 | 0.029 | 0.025 | 0.030 | 0.048 | 0.014 | 0.019 | 0.001 | 0.015 | 0.003 | 0.032 | 0.065 | 0.332 | 0.057 | 0.021 | 0.037 |
| 3PL-04 | 0.010 | 0.011 | 0.030 | 0.029 | 0.026 | 0.049 | 0.006 | 0.019 | 0.035 | 0.027 | 0.018 | 0.028 | 0.066 | 0.321 | 0.059 | 0.021 | 0.039 |
| 3PL-05 | 0.009 | 0.009 | 0.029 | 0.027 | 0.028 | 0.052 | 0.000 | 0.024 | 0.001 | 0.015 | 0.002 | 0.030 | 0.063 | 0.320 | 0.058 | 0.025 | 0.037 |
| 3PL-06 | 0.011 | 0.011 | 0.030 | 0.028 | 0.027 | 0.063 | 0.000 | 0.020 | 0.001 | 0.019 | 0.002 | 0.028 | 0.063 | 0.317 | 0.055 | 0.020 | 0.041 |
| 3PL-07 | 0.012 | 0.012 | 0.034 | 0.027 | 0.028 | 0.058 | 0.000 | 0.022 | 0.001 | 0.016 | 0.002 | 0.030 | 0.067 | 0.330 | 0.065 | 0.039 | 0.042 |
| 3PL-08 | 0.017 | 0.018 | 0.033 | 0.026 | 0.029 | 0.049 | 0.001 | 0.018 | 0.002 | 0.019 | 0.005 | 0.031 | 0.071 | 0.355 | 0.056 | 0.021 | 0.037 |
| 3PL-09 | 0.024 | 0.025 | 0.032 | 0.026 | 0.029 | 0.052 | 0.001 | 0.020 | 0.000 | 0.015 | 0.002 | 0.031 | 0.064 | 0.325 | 0.056 | 0.022 | 0.036 |
| 3PL-10 | 0.013 | 0.014 | 0.036 | 0.027 | 0.028 | 0.059 | 0.001 | 0.021 | 0.001 | 0.016 | 0.002 | 0.029 | 0.064 | 0.321 | 0.050 | 0.019 | 0.035 |
| 3PL-11 | 0.012 | 0.012 | 0.031 | 0.028 | 0.027 | 0.061 | 0.000 | 0.022 | 0.001 | 0.016 | 0.002 | 0.029 | 0.063 | 0.320 | 0.054 | 0.020 | 0.037 |
| 3PL-12 | 0.013 | 0.014 | 0.030 | 0.028 | 0.027 | 0.056 | 0.000 | 0.030 | 0.001 | 0.015 | 0.002 | 0.034 | 0.068 | 0.330 | 0.062 | 0.036 | 0.037 |
| 3PL-13 | 0.011 | 0.012 | 0.032 | 0.028 | 0.027 | 0.055 | 0.001 | 0.020 | 0.002 | 0.019 | 0.003 | 0.029 | 0.066 | 0.326 | 0.054 | 0.020 | 0.035 |
| 3PL-14 | 0.010 | 0.011 | 0.033 | 0.027 | 0.028 | 0.050 | 0.000 | 0.020 | 0.010 | 0.018 | 0.004 | 0.029 | 0.065 | 0.324 | 0.069 | 0.027 | 0.041 |
| 3PL-15 | 0.011 | 0.011 | 0.028 | 0.028 | 0.028 | 0.054 | 0.001 | 0.020 | 0.001 | 0.019 | 0.003 | 0.028 | 0.063 | 0.318 | 0.057 | 0.037 | 0.037 |
| 3PL-16 | 0.010 | 0.011 | 0.028 | 0.029 | 0.026 | 0.068 | 0.000 | 0.025 | 0.000 | 0.016 | 0.002 | 0.031 | 0.071 | 0.331 | 0.056 | 0.004 | 0.036 |
| 3PL-17 | 0.010 | 0.010 | 0.027 | 0.030 | 0.025 | 0.049 | 0.028 | 0.019 | 0.001 | 0.031 | 0.029 | 0.028 | 0.066 | 0.318 | 0.058 | 0.019 | 0.039 |
| 2022 | | | | | | | | | | | | | | | | | |
| 3PL-01 | 0.022 | 0.023 | 0.023 | 0.022 | 0.027 | 0.037 | 0.000 | 0.025 | 0.002 | 0.008 | 0.001 | 0.034 | 0.053 | 0.269 | 0.069 | 0.039 | 0.030 |
| 3PL-02 | 0.010 | 0.011 | 0.021 | 0.024 | 0.025 | 0.038 | 0.000 | 0.018 | 0.006 | 0.011 | 0.002 | 0.024 | 0.050 | 0.253 | 0.065 | 0.015 | 0.038 |
| 3PL-03 | 0.031 | 0.032 | 0.021 | 0.018 | 0.030 | 0.032 | 0.028 | 0.014 | 0.004 | 0.009 | 0.002 | 0.033 | 0.055 | 0.286 | 0.023 | 0.004 | 0.027 |
| 3PL-04 | 0.007 | 0.007 | 0.018 | 0.027 | 0.022 | 0.035 | 0.015 | 0.013 | 0.035 | 0.027 | 0.014 | 0.023 | 0.056 | 0.264 | 0.021 | 0.005 | 0.024 |
| 3PL-05 | 0.005 | 0.005 | 0.022 | 0.024 | 0.025 | 0.041 | 0.001 | 0.026 | 0.004 | 0.008 | 0.001 | 0.029 | 0.053 | 0.262 | 0.029 | 0.007 | 0.033 |
| 3PL-06 | 0.007 | 0.007 | 0.020 | 0.026 | 0.023 | 0.068 | 0.001 | 0.016 | 0.008 | 0.015 | 0.001 | 0.023 | 0.051 | 0.254 | 0.027 | 0.006 | 0.031 |
| 3PL-07 | 0.008 | 0.008 | 0.023 | 0.025 | 0.025 | 0.057 | 0.001 | 0.019 | 0.003 | 0.011 | 0.001 | 0.030 | 0.062 | 0.290 | 0.039 | 0.009 | 0.042 |
| 3PL-08 | 0.017 | 0.018 | 0.026 | 0.020 | 0.029 | 0.037 | 0.003 | 0.012 | 0.017 | 0.016 | 0.003 | 0.030 | 0.071 | 0.355 | 0.024 | 0.005 | 0.024 |
| 3PL-09 | 0.019 | 0.019 | 0.031 | 0.020 | 0.028 | 0.040 | 0.001 | 0.017 | 0.002 | 0.009 | 0.001 | 0.029 | 0.052 | 0.267 | 0.025 | 0.004 | 0.029 |
| 3PL-10 | 0.009 | 0.010 | 0.036 | 0.023 | 0.026 | 0.049 | 0.001 | 0.018 | 0.026 | 0.010 | 0.001 | 0.026 | 0.052 | 0.261 | 0.029 | 0.001 | 0.030 |
| 3PL-11 | 0.008 | 0.008 | 0.025 | 0.025 | 0.025 | 0.056 | 0.001 | 0.019 | 0.006 | 0.011 | 0.001 | 0.025 | 0.052 | 0.260 | 0.029 | 0.005 | 0.031 |
| 3PL-12 | 0.011 | 0.011 | 0.021 | 0.026 | 0.024 | 0.047 | 0.000 | 0.039 | 0.005 | 0.008 | 0.001 | 0.027 | 0.049 | 0.250 | 0.019 | 0.001 | 0.027 |
| 3PL-13 | 0.008 | 0.009 | 0.027 | 0.024 | 0.025 | 0.043 | 0.001 | 0.014 | 0.016 | 0.017 | 0.002 | 0.025 | 0.057 | 0.277 | 0.028 | 0.005 | 0.026 |
| 3PL-14 | 0.008 | 0.008 | 0.026 | 0.022 | 0.027 | 0.037 | 0.001 | 0.016 | 0.027 | 0.011 | 0.002 | 0.027 | 0.053 | 0.270 | 0.014 | 0.005 | 0.026 |
| 3PL-15 | 0.009 | 0.009 | 0.021 | 0.023 | 0.027 | 0.039 | 0.002 | 0.014 | 0.008 | 0.016 | 0.003 | 0.025 | 0.057 | 0.282 | 0.031 | 0.015 | 0.030 |
| 3PL-16 | 0.008 | 0.007 | 0.016 | 0.025 | 0.025 | 0.053 | 0.001 | 0.017 | 0.002 | 0.012 | 0.001 | 0.027 | 0.061 | 0.285 | 0.041 | 0.006 | 0.026 |
| 3PL-17 | 0.006 | 0.006 | 0.017 | 0.030 | 0.020 | 0.035 | 0.006 | 0.014 | 0.008 | 0.031 | 0.029 | 0.023 | 0.054 | 0.252 | 0.024 | 0.004 | 0.028 |
| 2023 | | | | | | | | | | | | | | | | | |
| 3PL-01 | 0.031 | 0.032 | 0.026 | 0.022 | 0.029 | 0.040 | 0.000 | 0.020 | 0.003 | 0.010 | 0.001 | 0.029 | 0.055 | 0.287 | 0.069 | 0.015 | 0.035 |
| 3PL-02 | 0.015 | 0.016 | 0.023 | 0.024 | 0.026 | 0.040 | 0.000 | 0.017 | 0.009 | 0.013 | 0.003 | 0.021 | 0.048 | 0.257 | 0.046 | 0.003 | 0.031 |
| 3PL-03 | 0.024 | 0.026 | 0.020 | 0.020 | 0.030 | 0.038 | 0.028 | 0.016 | 0.006 | 0.010 | 0.002 | 0.033 | 0.059 | 0.307 | 0.045 | 0.011 | 0.034 |
| 3PL-04 | 0.010 | 0.011 | 0.021 | 0.027 | 0.024 | 0.038 | 0.006 | 0.013 | 0.035 | 0.028 | 0.019 | 0.021 | 0.058 | 0.280 | 0.038 | 0.011 | 0.029 |
| 3PL-05 | 0.012 | 0.012 | 0.033 | 0.022 | 0.028 | 0.046 | 0.000 | 0.021 | 0.005 | 0.010 | 0.001 | 0.034 | 0.060 | 0.303 | 0.047 | 0.030 | 0.033 |
| 3PL-06 | 0.010 | 0.010 | 0.026 | 0.026 | 0.025 | 0.068 | 0.000 | 0.015 | 0.006 | 0.017 | 0.002 | 0.021 | 0.053 | 0.269 | 0.046 | 0.011 | 0.032 |
| 3PL-07 | 0.011 | 0.012 | 0.023 | 0.024 | 0.026 | 0.063 | 0.000 | 0.019 | 0.004 | 0.011 | 0.001 | 0.023 | 0.053 | 0.272 | 0.039 | 0.004 | 0.033 |
| 3PL-08 | 0.019 | 0.020 | 0.026 | 0.021 | 0.029 | 0.039 | 0.001 | 0.012 | 0.020 | 0.017 | 0.005 | 0.027 | 0.071 | 0.355 | 0.046 | 0.012 | 0.035 |
| 3PL-09 | 0.020 | 0.021 | 0.023 | 0.020 | 0.030 | 0.043 | 0.001 | 0.017 | 0.002 | 0.010 | 0.001 | 0.028 | 0.053 | 0.282 | 0.044 | 0.012 | 0.033 |
| 3PL-10 | 0.015 | 0.016 | 0.023 | 0.023 | 0.027 | 0.059 | 0.000 | 0.017 | 0.017 | 0.012 | 0.001 | 0.023 | 0.052 | 0.273 | 0.053 | 0.039 | 0.033 |
| 3PL-11 | 0.012 | 0.012 | 0.024 | 0.026 | 0.025 | 0.068 | 0.000 | 0.020 | 0.006 | 0.012 | 0.001 | 0.023 | 0.054 | 0.273 | 0.051 | 0.014 | 0.038 |
| 3PL-12 | 0.016 | 0.017 | 0.036 | 0.025 | 0.025 | 0.049 | 0.000 | 0.039 | 0.008 | 0.009 | 0.001 | 0.027 | 0.052 | 0.269 | 0.041 | 0.019 | 0.031 |
| 3PL-13 | 0.012 | 0.012 | 0.031 | 0.024 | 0.026 | 0.046 | 0.001 | 0.013 | 0.015 | 0.019 | 0.004 | 0.023 | 0.060 | 0.295 | 0.048 | 0.013 | 0.033 |
| 3PL-14 | 0.012 | 0.013 | 0.027 | 0.023 | 0.027 | 0.051 | 0.000 | 0.023 | 0.026 | 0.010 | 0.001 | 0.022 | 0.049 | 0.261 | 0.031 | 0.003 | 0.042 |
| 3PL-15 | 0.014 | 0.014 | 0.021 | 0.023 | 0.027 | 0.041 | 0.001 | 0.014 | 0.011 | 0.017 | 0.004 | 0.021 | 0.050 | 0.266 | 0.038 | 0.004 | 0.031 |
| 3PL-16 | 0.017 | 0.017 | 0.028 | 0.024 | 0.026 | 0.050 | 0.000 | 0.014 | 0.004 | 0.017 | 0.002 | 0.021 | 0.052 | 0.270 | 0.063 | 0.002 | 0.032 |
| 3PL-17 | 0.009 | 0.009 | 0.022 | 0.030 | 0.020 | 0.039 | 0.001 | 0.013 | 0.008 | 0.031 | 0.029 | 0.021 | 0.059 | 0.270 | 0.043 | 0.019 | 0.035 |
| 2024 | | | | | | | | | | | | | | | | | |
| 3PL-01 | 0.020 | 0.021 | 0.023 | 0.021 | 0.028 | 0.037 | 0.000 | 0.019 | 0.003 | 0.009 | 0.002 | 0.034 | 0.057 | 0.300 | 0.045 | 0.024 | 0.036 |
| 3PL-02 | 0.009 | 0.009 | 0.016 | 0.024 | 0.026 | 0.037 | 0.000 | 0.018 | 0.005 | 0.012 | 0.003 | 0.023 | 0.049 | 0.265 | 0.040 | 0.025 | 0.033 |
| 3PL-03 | 0.031 | 0.032 | 0.015 | 0.019 | 0.030 | 0.035 | 0.028 | 0.013 | 0.003 | 0.010 | 0.002 | 0.033 | 0.059 | 0.314 | 0.050 | 0.021 | 0.031 |
| 3PL-04 | 0.008 | 0.008 | 0.016 | 0.027 | 0.022 | 0.034 | 0.005 | 0.013 | 0.035 | 0.025 | 0.029 | 0.023 | 0.058 | 0.284 | 0.041 | 0.019 | 0.034 |
| 3PL-05 | 0.013 | 0.014 | 0.036 | 0.021 | 0.028 | 0.039 | 0.000 | 0.020 | 0.003 | 0.009 | 0.001 | 0.031 | 0.055 | 0.288 | 0.050 | 0.013 | 0.041 |
| 3PL-06 | 0.008 | 0.008 | 0.016 | 0.026 | 0.024 | 0.068 | 0.000 | 0.015 | 0.005 | 0.017 | 0.002 | 0.023 | 0.054 | 0.276 | 0.050 | 0.023 | 0.034 |
| 3PL-07 | 0.008 | 0.008 | 0.022 | 0.025 | 0.024 | 0.067 | 0.000 | 0.020 | 0.003 | 0.011 | 0.001 | 0.027 | 0.058 | 0.289 | 0.060 | 0.039 | 0.042 |
| 3PL-08 | 0.013 | 0.014 | 0.022 | 0.022 | 0.028 | 0.035 | 0.001 | 0.013 | 0.016 | 0.016 | 0.007 | 0.029 | 0.071 | 0.355 | 0.052 | 0.021 | 0.041 |
| 3PL-09 | 0.009 | 0.010 | 0.016 | 0.022 | 0.028 | 0.039 | 0.001 | 0.020 | 0.001 | 0.010 | 0.001 | 0.031 | 0.055 | 0.291 | 0.048 | 0.020 | 0.037 |
| 3PL-10 | 0.010 | 0.011 | 0.019 | 0.024 | 0.025 | 0.060 | 0.000 | 0.019 | 0.008 | 0.011 | 0.001 | 0.025 | 0.053 | 0.278 | 0.043 | 0.020 | 0.036 |
| 3PL-11 | 0.009 | 0.009 | 0.016 | 0.025 | 0.024 | 0.066 | 0.000 | 0.020 | 0.003 | 0.012 | 0.001 | 0.025 | 0.055 | 0.280 | 0.049 | 0.022 | 0.035 |
| 3PL-12 | 0.010 | 0.011 | 0.021 | 0.026 | 0.024 | 0.049 | 0.000 | 0.039 | 0.005 | 0.009 | 0.001 | 0.026 | 0.051 | 0.268 | 0.046 | 0.012 | 0.033 |
| 3PL-13 | 0.009 | 0.009 | 0.016 | 0.025 | 0.025 | 0.043 | 0.001 | 0.014 | 0.009 | 0.019 | 0.005 | 0.025 | 0.061 | 0.302 | 0.045 | 0.020 | 0.033 |
| 3PL-14 | 0.008 | 0.009 | 0.017 | 0.024 | 0.026 | 0.051 | 0.000 | 0.021 | 0.017 | 0.010 | 0.001 | 0.024 | 0.050 | 0.266 | 0.055 | 0.023 | 0.035 |
| 3PL-15 | 0.011 | 0.011 | 0.015 | 0.023 | 0.027 | 0.039 | 0.001 | 0.014 | 0.008 | 0.015 | 0.004 | 0.023 | 0.050 | 0.267 | 0.036 | 0.011 | 0.031 |
| 3PL-16 | 0.019 | 0.020 | 0.028 | 0.023 | 0.027 | 0.038 | 0.000 | 0.013 | 0.005 | 0.021 | 0.007 | 0.024 | 0.056 | 0.291 | 0.069 | 0.005 | 0.033 |
| 3PL-17 | 0.006 | 0.007 | 0.013 | 0.030 | 0.020 | 0.045 | 0.001 | 0.013 | 0.006 | 0.031 | 0.017 | 0.023 | 0.060 | 0.277 | 0.042 | 0.018 | 0.031 |

**Table A3.** The weights of criteria for all scenarios in sensitivity analysis.

| **Criteria** | **Base case** | **Scenario 1** | **Scenario 2** | **Scenario 3** | **Scenario 4** | **Scenario 5** | **Scenario 6** | **Scenario 7** | **Scenario 8** | **Scenario 9** | **Scenario 10** | **Scenario 11** | **Scenario 12** | **Scenario 13** | **Scenario 14** | **Scenario 15** | **Scenario 16** | **Scenario 17** |
| --- | --- | --- | --- | --- | --- | --- | --- | --- | --- | --- | --- | --- | --- | --- | --- | --- | --- | --- |
| C1 | 0.031 | 0.000 | 0.032 | 0.032 | 0.032 | 0.032 | 0.033 | 0.031 | 0.032 | 0.032 | 0.032 | 0.032 | 0.032 | 0.033 | 0.047 | 0.033 | 0.032 | 0.032 |
| C2 | 0.032 | 0.033 | 0.000 | 0.033 | 0.033 | 0.033 | 0.035 | 0.033 | 0.034 | 0.033 | 0.033 | 0.033 | 0.033 | 0.035 | 0.050 | 0.035 | 0.034 | 0.034 |
| C3 | 0.036 | 0.037 | 0.037 | 0.000 | 0.037 | 0.037 | 0.039 | 0.037 | 0.037 | 0.037 | 0.037 | 0.037 | 0.037 | 0.039 | 0.056 | 0.039 | 0.037 | 0.038 |
| C4 | 0.030 | 0.031 | 0.031 | 0.031 | 0.000 | 0.031 | 0.032 | 0.031 | 0.031 | 0.031 | 0.031 | 0.031 | 0.031 | 0.032 | 0.047 | 0.032 | 0.031 | 0.032 |
| C5 | 0.030 | 0.031 | 0.031 | 0.031 | 0.031 | 0.000 | 0.032 | 0.031 | 0.031 | 0.031 | 0.031 | 0.031 | 0.031 | 0.032 | 0.047 | 0.032 | 0.031 | 0.032 |
| C6 | 0.068 | 0.070 | 0.071 | 0.071 | 0.070 | 0.070 | 0.000 | 0.070 | 0.071 | 0.071 | 0.071 | 0.070 | 0.071 | 0.074 | 0.106 | 0.073 | 0.071 | 0.071 |
| C7 | 0.028 | 0.029 | 0.029 | 0.029 | 0.029 | 0.029 | 0.030 | 0.000 | 0.029 | 0.029 | 0.029 | 0.029 | 0.029 | 0.030 | 0.043 | 0.030 | 0.029 | 0.029 |
| C8 | 0.039 | 0.040 | 0.040 | 0.040 | 0.040 | 0.040 | 0.042 | 0.040 | 0.000 | 0.040 | 0.040 | 0.040 | 0.040 | 0.042 | 0.060 | 0.042 | 0.041 | 0.041 |
| C9 | 0.035 | 0.036 | 0.036 | 0.037 | 0.036 | 0.036 | 0.038 | 0.036 | 0.037 | 0.000 | 0.036 | 0.036 | 0.036 | 0.038 | 0.055 | 0.038 | 0.037 | 0.037 |
| C10 | 0.031 | 0.032 | 0.032 | 0.032 | 0.032 | 0.032 | 0.033 | 0.032 | 0.032 | 0.032 | 0.000 | 0.032 | 0.032 | 0.034 | 0.048 | 0.033 | 0.032 | 0.033 |
| C11 | 0.029 | 0.030 | 0.030 | 0.030 | 0.030 | 0.030 | 0.031 | 0.030 | 0.031 | 0.030 | 0.030 | 0.000 | 0.030 | 0.032 | 0.045 | 0.032 | 0.031 | 0.031 |
| C12 | 0.034 | 0.035 | 0.035 | 0.035 | 0.035 | 0.035 | 0.036 | 0.035 | 0.035 | 0.035 | 0.035 | 0.035 | 0.000 | 0.036 | 0.053 | 0.036 | 0.035 | 0.035 |
| C13 | 0.071 | 0.073 | 0.073 | 0.074 | 0.073 | 0.073 | 0.076 | 0.073 | 0.074 | 0.074 | 0.073 | 0.073 | 0.074 | 0.000 | 0.110 | 0.076 | 0.074 | 0.074 |
| C14 | 0.355 | 0.366 | 0.367 | 0.368 | 0.366 | 0.366 | 0.381 | 0.365 | 0.369 | 0.368 | 0.366 | 0.365 | 0.367 | 0.382 | 0.000 | 0.381 | 0.369 | 0.370 |
| C15 | 0.069 | 0.071 | 0.072 | 0.072 | 0.071 | 0.071 | 0.074 | 0.071 | 0.072 | 0.072 | 0.071 | 0.071 | 0.072 | 0.075 | 0.107 | 0.000 | 0.072 | 0.072 |
| C16 | 0.039 | 0.040 | 0.040 | 0.040 | 0.040 | 0.040 | 0.042 | 0.040 | 0.040 | 0.040 | 0.040 | 0.040 | 0.040 | 0.042 | 0.060 | 0.042 | 0.000 | 0.040 |
| C17 | 0.042 | 0.044 | 0.044 | 0.044 | 0.043 | 0.043 | 0.045 | 0.043 | 0.044 | 0.044 | 0.044 | 0.043 | 0.044 | 0.045 | 0.065 | 0.045 | 0.044 | 0.000 |

.

**Table A4.** The prospect values of alternatives for all scenarios in sensitivity analysis.

| **CRITERIA** | **Base case** | **Scenario 1** | **Scenario 2** | **Scenario 3** | **Scenario 4** | **Scenario 5** | **Scenario 6** | **Scenario 7** | **Scenario 8** | **Scenario 9** | **Scenario 10** | **Scenario 11** | **Scenario 12** | **Scenario 13** | **Scenario 14** | **Scenario 15** | **Scenario 16** | **Scenario 17** |
| --- | --- | --- | --- | --- | --- | --- | --- | --- | --- | --- | --- | --- | --- | --- | --- | --- | --- | --- |
| ACV | 0.036 | 0.038 | 0.039 | 0.037 | 0.037 | 0.038 | 0.037 | 0.037 | 0.039 | 0.037 | 0.037 | 0.037 | 0.039 | 0.038 | 0.000 | 0.044 | 0.041 | 0.038 |
| ASG | 0.062 | 0.065 | 0.065 | 0.066 | 0.065 | 0.065 | 0.067 | 0.064 | 0.065 | 0.065 | 0.065 | 0.064 | 0.065 | 0.065 | 0.011 | 0.077 | 0.066 | 0.067 |
| DVP | 0.006 | 0.007 | 0.007 | 0.005 | 0.005 | 0.007 | 0.003 | 0.007 | 0.005 | 0.006 | 0.006 | 0.006 | 0.007 | 0.006 | 0.014 | 0.004 | 0.006 | 0.006 |
| EMS | 0.047 | 0.048 | 0.048 | 0.048 | 0.050 | 0.048 | 0.049 | 0.049 | 0.049 | 0.052 | 0.050 | 0.049 | 0.048 | 0.052 | 0.016 | 0.050 | 0.049 | 0.049 |
| GMD | 0.047 | 0.048 | 0.048 | 0.051 | 0.049 | 0.050 | 0.050 | 0.048 | 0.050 | 0.049 | 0.048 | 0.048 | 0.050 | 0.050 | 0.017 | 0.051 | 0.049 | 0.050 |
| GSP | 0.059 | 0.061 | 0.061 | 0.062 | 0.062 | 0.061 | 0.071 | 0.061 | 0.062 | 0.061 | 0.061 | 0.061 | 0.061 | 0.063 | 0.014 | 0.064 | 0.062 | 0.064 |
| HAH | 0.025 | 0.026 | 0.026 | 0.028 | 0.027 | 0.027 | 0.029 | 0.026 | 0.027 | 0.026 | 0.026 | 0.026 | 0.026 | 0.027 | -0.009 | 0.032 | 0.028 | 0.030 |
| NCT | 0.001 | 0.001 | 0.001 | 0.002 | 0.001 | 0.002 | -0.001 | 0.001 | 0.002 | 0.001 | 0.001 | 0.001 | 0.001 | 0.002 | 0.015 | -0.001 | 0.000 | 0.001 |
| PHP | 0.044 | 0.046 | 0.046 | 0.047 | 0.045 | 0.047 | 0.047 | 0.045 | 0.046 | 0.045 | 0.045 | 0.045 | 0.046 | 0.047 | 0.020 | 0.045 | 0.046 | 0.046 |
| PVP | 0.049 | 0.051 | 0.051 | 0.054 | 0.052 | 0.052 | 0.055 | 0.051 | 0.052 | 0.051 | 0.051 | 0.051 | 0.051 | 0.052 | 0.019 | 0.052 | 0.052 | 0.051 |
| PVT | 0.053 | 0.055 | 0.055 | 0.056 | 0.056 | 0.056 | 0.064 | 0.055 | 0.056 | 0.055 | 0.055 | 0.055 | 0.055 | 0.057 | 0.014 | 0.057 | 0.056 | 0.057 |
| SGP | 0.057 | 0.059 | 0.059 | 0.060 | 0.059 | 0.058 | 0.062 | 0.058 | 0.065 | 0.059 | 0.058 | 0.058 | 0.059 | 0.060 | 0.014 | 0.060 | 0.060 | 0.059 |
| TCW | 0.035 | 0.037 | 0.037 | 0.040 | 0.037 | 0.037 | 0.038 | 0.036 | 0.037 | 0.037 | 0.037 | 0.036 | 0.037 | 0.038 | 0.016 | 0.038 | 0.037 | 0.036 |
| TMS | 0.048 | 0.050 | 0.050 | 0.051 | 0.050 | 0.051 | 0.052 | 0.050 | 0.051 | 0.051 | 0.050 | 0.050 | 0.050 | 0.051 | 0.016 | 0.053 | 0.051 | 0.051 |
| VFC | 0.062 | 0.064 | 0.064 | 0.065 | 0.065 | 0.065 | 0.067 | 0.064 | 0.065 | 0.065 | 0.065 | 0.064 | 0.064 | 0.065 | 0.020 | 0.068 | 0.071 | 0.065 |
| VOS | 0.053 | 0.054 | 0.054 | 0.055 | 0.055 | 0.055 | 0.059 | 0.054 | 0.055 | 0.055 | 0.055 | 0.054 | 0.054 | 0.056 | 0.019 | 0.059 | 0.056 | 0.054 |
| VTP | 0.050 | 0.051 | 0.051 | 0.050 | 0.054 | 0.050 | 0.053 | 0.051 | 0.052 | 0.052 | 0.052 | 0.051 | 0.051 | 0.054 | 0.009 | 0.062 | 0.052 | 0.053 |
